# Supplementary material for: MiRNA Profiling in Plasma and Placenta of SARS-CoV-2-Infected Pregnant Women
Source: MDPI journal article supplement (doi:10.3390/cells10071788), 2021-07-15
Supplement: s1 [file s1]

**Supplementary Table 1. Timing of infection and leukocyte distribution in SIPW and UPW**

| SARS-CoV-2 Infected Pregnant Women (SIPW) | $\Delta$ (in days)* | Leukocyte distribution** |             |           |             |           |
|-------------------------------------------|---------------------|--------------------------|-------------|-----------|-------------|-----------|
|                                           |                     | Neutrophils              | Lymphocytes | Monocytes | Eosinophils | Basophils |
| 1                                         | 1                   | 9,15                     | 2,1         | 1,08      | 0,48        | 0,03      |
| 2                                         | 0                   | 9,44                     | 1,1         | 0,41      | 0           | 0,01      |
| 3                                         | 1                   | 12,44                    | 0,38        | 1         | 0,13        | 0,03      |
| 4                                         | 3                   | 5,58                     | 1,14        | 0,47      | 0           | 0,01      |
| 5                                         | 7                   | 4,57                     | 1,05        | 0,35      | 0,02        | 0,01      |
| 6                                         | 1                   | 3,18                     | 0,77        | 0,42      | 0           | 0,01      |
| 7                                         | 6                   | 8,15                     | 0,87        | 0,82      | 0,03        | 0,03      |
| 8                                         | 1                   | 6,5                      | 0,82        | 0,55      | 0,01        | 0,01      |
| 9                                         | -1                  | 17,69                    | 3,07        | 1,54      | 0,68        | 0,1       |
| 10                                        | 2                   | 7,17                     | 2,17        | 0,67      | 0,07        | 0,02      |
| 11                                        | 0                   | 11,46                    | 1,54        | 1,04      | 0,08        | 0,03      |
| 12                                        | 1                   | 5,98                     | 1,04        | 0,51      | 0,01        | 0,01      |
| 13                                        | 3                   | 10,27                    | 2,55        | 0,72      | 0,12        | 0,07      |
| 14                                        | 0                   | 9,48                     | 1,7         | 0,43      | 0,01        | 0,02      |
| 15                                        | 9                   | 7,83                     | 2,94        | 0,74      | 0,08        | 0,04      |

| Uninfected Pregnant Women (UPW) | $\Delta$ (in days)* | Leukocyte distribution ** |             |           |             |           |
|---------------------------------|---------------------|---------------------------|-------------|-----------|-------------|-----------|
|                                 |                     | Neutrophils               | Lymphocytes | Monocytes | Eosinophils | Basophils |
| 1                               | 0                   | N/A                       | N/A         | N/A       | N/A         | N/A       |
| 2                               | 0                   | N/A                       | N/A         | N/A       | N/A         | N/A       |
| 3                               | 0                   | 6,19                      | 2,46        | 0,95      | 0,35        | 0,07      |
| 4                               | 0                   | 11,87                     | 2,28        | 1,43      | 0,17        | 0,03      |
| 5                               | 0                   | 5,93                      | 2,81        | 0,77      | 0,08        | 0,03      |
| 6                               | 0                   | 7,21                      | 2,76        | 0,76      | 0,13        | 0,04      |

\* Difference in days between the first SARS-CoV-2 positive nasopharyngeal swab and day of delivery.

\*\* Absolute cell count, cell x  $10^3/\mu\text{l}$  of blood.
